# Supplementary material for: Insight into the evolution and functional characteristics of the pan‐genome assembly from sesame landraces and modern cultivars
Source: PubMed Central journal article supplement (PMC6587448; doi:10.1111/pbi.13022), 2018-12-08
Supplement: PBI-17-881-s004.pdf [file PBI-17-881-s004.pdf]

**Table S1. Length of different chromosomes among five sesame varieties.**

| <b>Chromosomes</b>                      | <b>Zhongzhi13</b> | <b>Yuzhi11</b> | <b>Swetha</b> | <b>Baizhima</b> | <b>Mishuozhima</b> |
|-----------------------------------------|-------------------|----------------|---------------|-----------------|--------------------|
| chr1                                    | 20,257,639        | 12,144,622     | 20,388,621    | 16,884,392      | 17,370,318         |
| chr2                                    | 18,415,740        | 12,915,212     | 23,333,770    | 15,525,223      | 16,328,919         |
| chr3                                    | 25,850,335        | 17,785,867     | 30,392,377    | 21,718,316      | 21,652,934         |
| chr4                                    | 20,582,917        | 12,372,216     | 24,785,314    | 17,303,766      | 17,134,316         |
| chr5                                    | 16,584,689        | 10,031,574     | 18,293,400    | 13,863,986      | 13,937,600         |
| chr6                                    | 25,967,286        | 18,405,807     | 31,370,383    | 22,640,701      | 22,313,205         |
| chr7                                    | 16,756,707        | 10,398,139     | 17,970,893    | 13,032,758      | 13,399,501         |
| chr8                                    | 26,180,356        | 14,606,885     | 29,906,901    | 21,018,680      | 20,127,410         |
| chr9                                    | 22,847,643        | 17,771,763     | 29,228,532    | 19,605,500      | 19,600,886         |
| chr10                                   | 19,487,738        | 13,024,305     | 23,861,055    | 16,359,355      | 15,737,590         |
| chr11                                   | 14,047,238        | 10,685,523     | 16,560,068    | 12,110,835      | 11,541,233         |
| chr12                                   | 16,275,532        | 11,343,251     | 24,078,102    | 13,939,448      | 14,404,523         |
| chr13                                   | 16,472,772        | 10,087,436     | 19,120,267    | 13,821,448      | 14,070,408         |
| <b>Total Bases (chromosomes)</b>        | 259,726,592       | 171,572,600    | 309,289,683   | 217,824,408     | 217,618,843        |
| <b>Ratio of anchored on chromosomes</b> | 97.51%            | 81.52%         | 91.14%        | 81.87%          | 85.95%             |
